# Supplementary material for: Hypoxia regulates global membrane protein endocytosis through caveolin-1 in cancer cells
Source: PubMed Central journal article supplement (PMC4842985; doi:10.1038/ncomms11371), 2016-04-20
Supplement: ncomms11371-s1.pdf [file ncomms11371-s1.pdf]

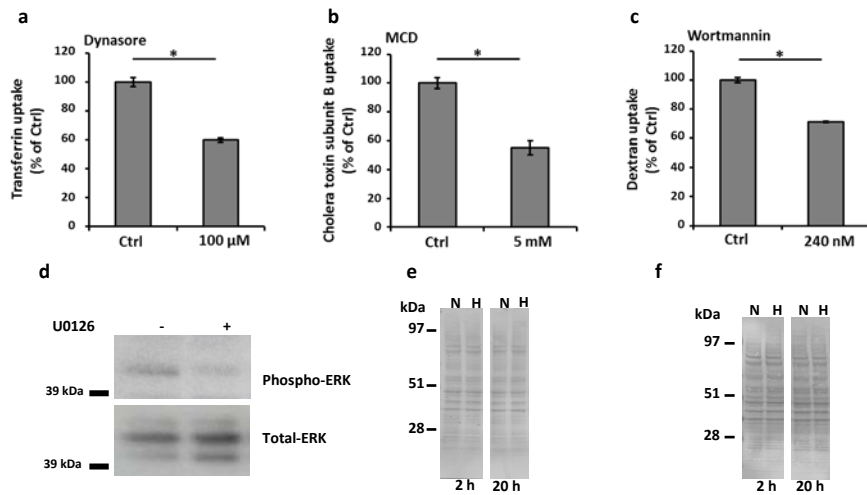

**Supplementary Figure 1. Effects of endocytosis inhibitors on their respective targets, and protein loading controls.** HeLa cells were pre-treated with the indicated concentrations of dynasore for 30 min (**a**), MCD for 1 h (**b**), or wortmannin for 1 h (**c**), and the effect on clathrin-mediated transferrin, membrane raft-dependent cholera toxin subunit-B and macropinocytic dextran uptake, respectively, was analysed by FACS. Data are presented as % of untreated control cells (Ctrl)  $\pm$  S.D. from three independent experiments. \*  $p < 0.05$ . **d**) HeLa cells were either untreated or pre-treated with the MEK inhibitor UO126 (10  $\mu$ M) for 1 h, and analysed by western blotting for phosphorylated ERK1/2 (phospho-ERK1/2) or total ERK1/2 as loading control. **e**) and **f**) Protein loading controls of experiments shown in **Fig. 2c** and **f**, respectively, show equal total protein loading from normoxic (N) and hypoxic (H) HeLa cells.

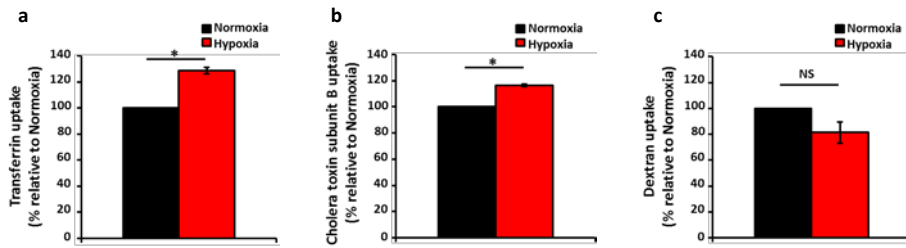

**Supplementary Figure 2. Effects of hypoxia on major endocytic pathways.** HeLa cells were pre-treated at normoxia or hypoxia (1% O<sub>2</sub>) for 20 h, and then analysed for the uptake of (a) transferrin (10 µg mL<sup>-1</sup>), (b) cholera toxin subunit-B (5 µg mL<sup>-1</sup>) or (c) dextran (500 µg mL<sup>-1</sup>) for 30 min by FACS. Data are presented as % of normoxic cells ± S.D. from three independent experiments. \* p < 0.05.

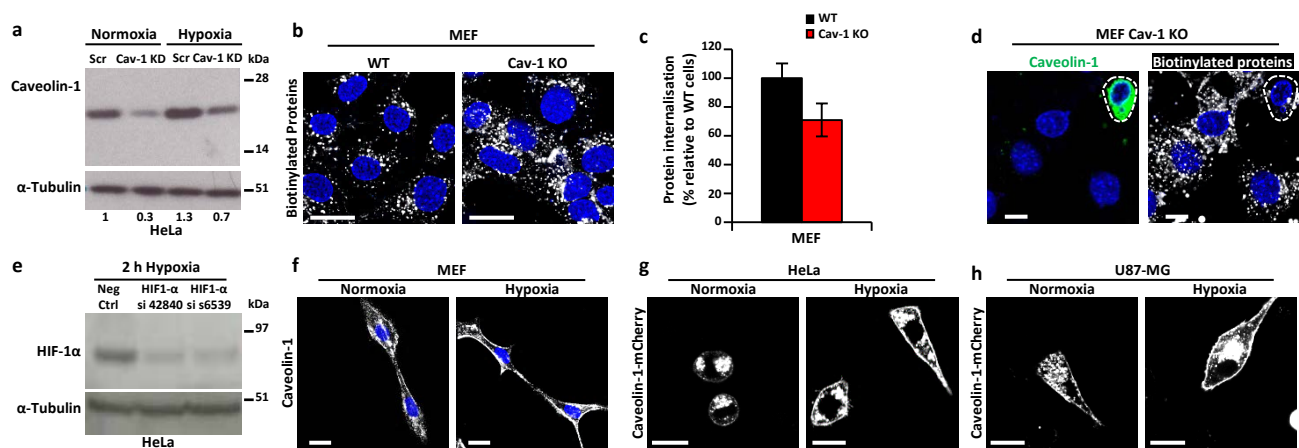

**Supplementary Figure 3. Hypoxic regulation of endocytosis and caveolin-1.** **a)** Caveolin-1 knockdown HeLa cells (Cav-1 KD) and control cells transduced with a scrambled shRNA sequence (Scr) from normoxic and hypoxic conditions were analysed by immunoblotting for caveolin-1 with tubulin as loading control. The caveolin-1 to tubulin ratios (normoxic Scr set to 1) from a representative experiment are indicated. **b)** Hypoxic wild-type (WT) and caveolin knockout (Cav-1 KO) MEF cells were surface biotinylated, followed by endocytosis for 30 min and subsequent cell-surface biotinylation depletion. Cells were stained for internalised proteins, showing increased internalisation in caveolin-1 KO as compared with WT MEF cells. Scale bar, 20  $\mu$ m. **c)** FACS quantification of the endocytosed proteome at 30 min in normoxic WT and Cav-1 KO MEF cells. Data are presented as % relative to WT cells  $\pm$  SD from two independent experiments (n = 3). **d)** Hypoxic Cav-1 KO MEF cells transiently transfected with caveolin-1 expressing plasmid were surface biotinylated followed by endocytosis for 30 min and subsequent depletion of cell-surface biotinylation. Cells were stained for internalised proteins and caveolin-1, showing decreased internalisation in caveolin-1 overexpressing cells (indicated by white dashed line). Scale bar, 10  $\mu$ m. **b)** and **d)**, Shown are representative images from three independent experiments. **e)** HIF-1 $\alpha$  knockdown

in hypoxic HeLa cells using siRNA transfection with two different sequences (siHIF-1 $\alpha$  42840 and s6539). Control HeLa cells were transfected with a scrambled siRNA sequence (Neg Ctrl). Shown is a representative immunoblotting for HIF-1 $\alpha$  and tubulin as loading control. **f)** Normoxic and hypoxic MEF WT cells were stained for caveolin-1, showing increased peripherical signal in hypoxic as compared with normoxic cells. **g)** HeLa and **h)** U87-MG caveolin-1 KD cells were transfected with caveolin-1-mCherry expressing plasmid, followed by treatment in normoxia or hypoxia for 2 h. Caveolin-1-mCherry cellular distribution was then visualized by confocal microscopy using laser excitation at 546 nm and a C-Apochromat 63X/1.20WM27 objective. Shown are representative images from at least three independent experiments (see also, *Supplementary Movies 2 and 3*). Scale bar, 20  $\mu$ m.

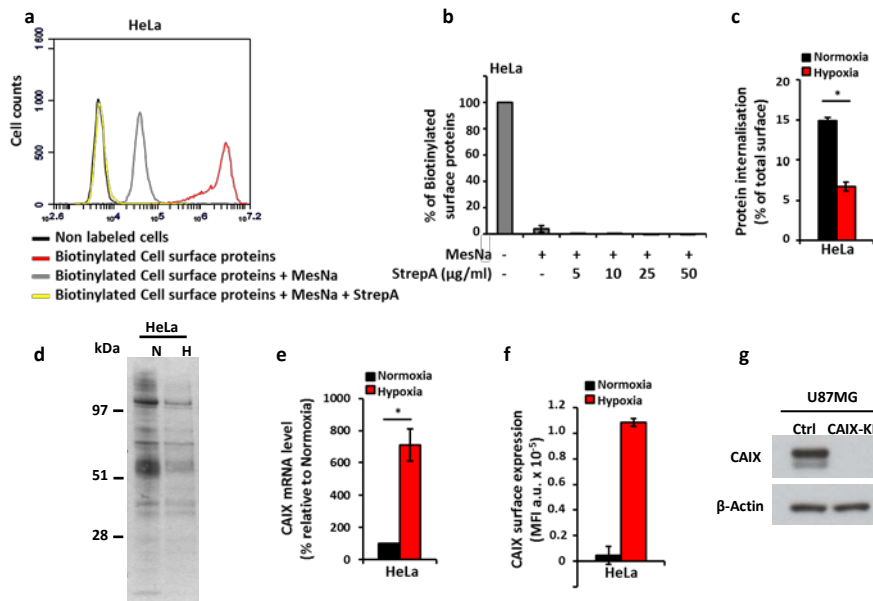

**Supplementary Figure 4. Optimised procedure for proteomic analyses of internalised surface proteins; hypoxic induction of CAIX.** **a)** FACS analysis of biotinylated cell-surface proteome in HeLa cells. Shown is a representative experiment of non biotinylated cells, total cell-surface biotinylation, cell-surface signal following reductive cleavage of biotin-protein linker with MesNa, and the complete absence of residual cell-surface signal following reductive cleavage of biotin-protein linker with MesNa and blocking with free streptavidin. **b)** Quantitative analysis from a similar experiment as in (a) shows efficient blocking of cell-surface biotinylation by combined MesNa treatment and free streptavidin. **c)** HeLa cells were pre-treated at normoxia or hypoxia (1% O<sub>2</sub>) for 20 h, followed by cell-surface biotinylation and endocytosis for 2 h. Residual surface proteins were removed by combined MesNa treatment and blocking with free streptavidin, and internalised proteins were quantified by FACS. Data are presented as % of total cell-surface biotinylation ± S.D. from three independent experiments. \* p < 0.05. **d)** Immunoblotting for endocytosed proteins from a similar experiment as described in (c) shows reduced protein levels in hypoxic as compared with normoxic cells. **e)** CAIX gene expression in hypoxic (20 h of hypoxia) vs. normoxic cells presented as % relative to normoxia ± SD from three independent experiments. \* p < 0.05. **f)** HeLa cells were pre-treated at normoxia or hypoxia (1% O<sub>2</sub>) for 20 h and analysed for cell-

surface CAIX expression by FACS. **g)** Stable CAIX knockdown U87-MG cells (CAIX KD) were generated by lentiviral shRNA transduction. CAIX KD and scrambled control (Ctrl) cell lysates from hypoxic conditions were analysed for CAIX by western blotting with  $\beta$ -actin as loading control.

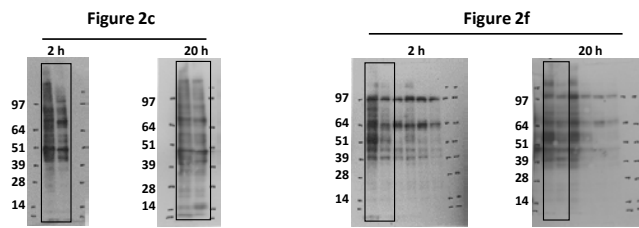

Figure 3d

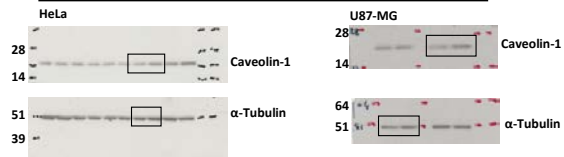

Figure 4d

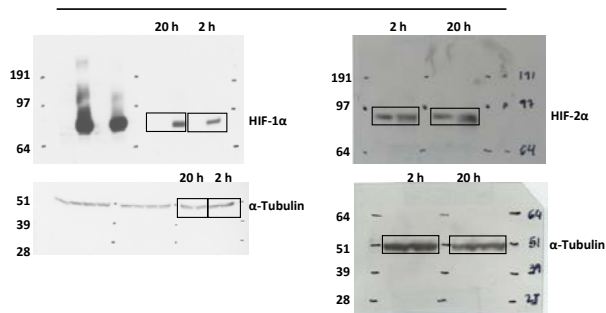

Figure 6a

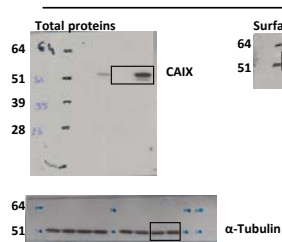

Supplementary Figure 3a

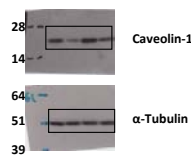

Supplementary Figure 3e

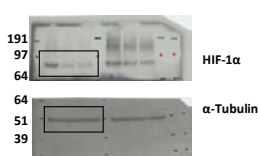

Figure 4g

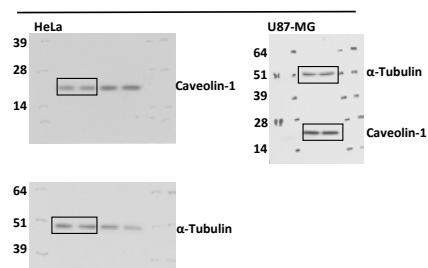

Supplementary Figure 1d

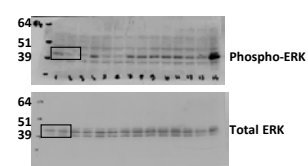

Supplementary Figure 4d

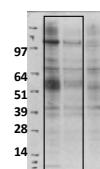

Supplementary Figure 4g

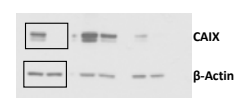

**Supplementary Figure 5. Full blots corresponding to portions of blots presented in the respective figures, as indicated.**

**Supplementary Table 1. Summary of selected membrane proteins showing hypoxia-induced internalisation. See also, Fig. 4.**

| <b>Protein ID</b>          | <b>Potential hypoxia regulation and role in tumour biology</b>                                                                                                   | <b>Refs.</b> |
|----------------------------|------------------------------------------------------------------------------------------------------------------------------------------------------------------|--------------|
| <b>CAIX</b>                | HIF induced; commonly associated with poor patient outcome; part of pH-regulatory machinery; potential target of treatment and PET tumor imaging.                | 1, 2         |
| <b>CD59</b>                | Contributes to tumor cell evasion of immune cell attack; potential treatment target.                                                                             | 3, 4         |
| <b>CD70</b>                | HIF induced; potential treatment target.                                                                                                                         | 5, 6         |
| <b>CXCR4</b>               | HIF induced; potential treatment target; receptor of non-viral gene delivery.                                                                                    | 7-9          |
| <b>DDR1</b>                | Receptor tyrosine kinase; potential treatment target.                                                                                                            | 10           |
| <b>EGFR</b>                | HIF induced; caveolin-1 regulated; established treatment target.                                                                                                 | 11, 12       |
| <b>ENG</b>                 | Hypoxia regulated; potential treatment target.                                                                                                                   | 13           |
| <b>ITGA3</b>               | Hypoxia regulated; potential treatment target.                                                                                                                   | 14, 15       |
| <b>ITGA5</b>               | Hypoxia induced in colon cancer cells.                                                                                                                           | 14, 16       |
| <b>SLC16A3</b>             | Part of pH-regulatory machinery; potential treatment target.                                                                                                     | 17, 18       |
| <b>SLC2A1, SLC2A3</b>      | HIF induced; major role in Warburg effect and hypoxic metabolism; associated with poor patient outcome; target of PET tumor imaging; potential treatment target. | 19           |
| <b>ALPP</b>                | Overexpressed in several tumor types; potential treatment target.                                                                                                | 20, 21       |
| <b>IGFR1</b>               | Hypoxia induced; potential treatment target.                                                                                                                     | 22, 23       |
| <b>IGFR2</b>               | Mainly described as a tumour suppressor.                                                                                                                         | 24           |
| <b>ITGA1, ITGA2, ITGB1</b> | Widely implicated in tumor biology and as potential treatment targets; hypoxic induction of ITGB1.                                                               | 14, 25, 26   |
| <b>MET</b>                 | Widely implicated in tumor biology and as a potential treatment target; few reports on hypoxic regulation.                                                       | 27, 28       |
| <b>PODXL</b>               | Associated with increased aggressiveness of various tumour types; potential surface marker of cancer cell stemness.                                              | 29           |
| <b>ROR2</b>                | HIF induced; potential treatment target.                                                                                                                         | 30, 31       |

1) Robertson, N. et al. *Cancer Research* (2004) 2) Pastorekova, S. et al. *BJU Int.* (2008) 3) Carter, D., Lieber, A. *FEBS letters* (2014) 4) Macor, P. et al. *Cancer res.* (2007) 5) Ruf, M. et al. *Clin. Cancer. Res.* (2015) 6) Law, C. L. *Cancer Res.* (2006) 7) Guan, G. et al. *Cancer lett.* (2015). 8) Brennecke, P. et al. *Clin. Exp. Metastasis.* (2014) 9) Egorova, A. et al. *J. Gene. Med.* (2014) 10) Kothiwale, S. *Drug Discov. Today.* (2015) 11) Franovic, A. et al. *Proc. Natl. Acad. Sci. U. S. A.* (2007) 12) Wang, Y. et al. *Proc. Natl. Acad. Sci. U. S. A.* (2012). 13) Debebe, Z., Rathmell, W.K. *Pharmacol. Ther.* (2015) 14) Saller, M. et al. *Biochem. Biophys. Res. Commun.* (2012) 15) Xiao, K. *Cancer res.* (2012) 16) Koike, T. et al. *Proc. Natl. Acad. Sci. U. S. A.* (2004) 17) Kim, Y. et al. *Hum. Pathol.* (2015) 18) Marchiq, I. et al. *Cancer Res.* (2015) 19) Vaupel, P. et al. *Cancer Metastasis Rev.* (2007) 20) Dua, P. et al. *Cancer Res.* (2013) 21) Dua, P. et al. *Nucleic Acid Ther.* (2015) 22) Murakami, A. et al. *PloS one* (2014) 23) Olmos, D. et al. *Lancet Oncol.* (2010) 24) Martin-Kleiner, I. et al. *Cancer Lett.* (2010) 25) Finger, E.C. et al. *Cancer Metastasis Rev.* (2010) 26) Keely, S. et al. *FASEB J.* (2009) 27) Pennacchietti, S. et al. *Cancer Cell.* (2003) 28) Furlan, A. et al. *Cancer Res.* (2014) 29) He, J. et al. *J. Proteome Res.* (2010) 30) Wright, T.M., Rathmell, W. K. *J. Biol. Chem.* (2010).
